# Supplementary material for: First Generation of Antioxidant Precursors for Bioisosteric Se-NSAIDs: Design, Synthesis, and In Vitro and In Vivo Anticancer Evaluation
Source: MDPI journal article supplement (doi:10.3390/antiox12091666), 2023-08-24
Supplement: s1 [file s1]

# First Generation of Antioxidant Precursors for Bioisosteric Se-NSAIDs: Design, Synthesis and In Vitro and In Vivo Anticancer Evaluation

Sandra Ramos-Inza <sup>1,2</sup>, Cesar Aliaga <sup>3</sup>, Ignacio Encío <sup>4</sup>, Asif Raza <sup>3</sup>, Arun K. Sharma <sup>3,\*</sup>, Carlos Aydillo <sup>1,2</sup>, Nuria Martínez <sup>1</sup>, Carmen Sanmartín <sup>1,2,\*</sup> and Daniel Plano <sup>1,2,\*</sup>

<sup>1</sup> Department of Pharmaceutical Technology and Chemistry, University of Navarra, Irunlarrea 1, 31008 Pamplona, Spain

<sup>2</sup> Instituto de Investigación Sanitaria de Navarra (IdiSNA), Irunlarrea 3, 31008 Pamplona, Spain

<sup>3</sup> Department of Pharmacology, Penn State Cancer Institute, CH72, Penn State College of Medicine, 500 University Drive, Hershey, PA 17033, USA

<sup>4</sup> Department of Health Sciences, Public University of Navarra, Ayda. Barañain s/n, 31008 Pamplona, Spain

\* Correspondence: asharma1@pennstatehealth.psu.edu (A.K.S.); sanmartin@unav.es (C.S.); dplano@unav.es (D.P.)

---

## Table of Contents

|                                                                                    |       |                        |
|------------------------------------------------------------------------------------|-------|------------------------|
| <b>Biological evaluation</b>                                                       |       |                        |
| <b>GI<sub>50</sub>, TGI and LD<sub>50</sub> values</b>                             | ..... | <b>Table S1</b>        |
| <b>Chemical characterization</b>                                                   |       |                        |
| <b><sup>1</sup>H, <sup>13</sup>C and <sup>77</sup>Se NMR spectra, qNMR spectra</b> |       |                        |
| <b>1</b>                                                                           | ..... | <b>Figures S1-S4</b>   |
| <b>2</b>                                                                           | ..... | <b>Figures S5-S8</b>   |
| <b>3</b>                                                                           | ..... | <b>Figures S9-S12</b>  |
| <b>4</b>                                                                           | ..... | <b>Figures S13-S16</b> |
| <b>5</b>                                                                           | ..... | <b>Figures S17-S20</b> |
| <b>Mass spectrum of compound 5</b>                                                 | ..... | <b>Figure S21</b>      |

---

## Biological evaluation

### GI<sub>50</sub>, TGI and LD<sub>50</sub> values

**Table S1.** GI<sub>50</sub>, TGI and LD<sub>50</sub> values (in  $\mu\text{M}$ )<sup>a</sup> for the Se-NSAID analogs in colon (HT-29, HCT-116), prostate (DU-145, PC-3), breast (MDA-MB-231, T-47D, 184B5) and lung (H1299, A549, BEAS-2B) cell lines.

| Compounds |                  | Colon cell lines |             | Prostate cell lines |           | Breast cell lines |             |            | Lung cell lines |            |            |
|-----------|------------------|------------------|-------------|---------------------|-----------|-------------------|-------------|------------|-----------------|------------|------------|
|           |                  | HT-29            | HCT-116     | DU-145              | PC-3      | MDA-MB-231        | T-47D       | 184B5      | H1299           | A549       | BEAS-2B    |
| 1         | GI <sub>50</sub> | 3.9 ± 0.4        | 21.0 ± 4.0  | 4.4 ± 0.5           | 2.8 ± 0.2 | 6.6 ± 2.2         | 1.6 ± 0.3   | 7.0 ± 1.1  | 7.7 ± 1.2       | >100       | 3.9 ± 1.3  |
|           | TGI              | 6.2 ± 1.9        | 44.5 ± 7.1  | 5.1 ± 0.2           | 3.0 ± 0.3 | 15.3 ± 4.6        | 2.9 ± 0.6   | 11.3 ± 1.4 | 9.4 ± 0.8       | 26.2 ± 5.8 | 8.4 ± 2.4  |
|           | LD <sub>50</sub> | >100             | 88.0 ± 3.5  | 6.1 ± 0.7           | 3.3 ± 0.4 | >100              | 6.0 ± 1.9   | 21.1 ± 3.9 | >100            | 74.6 ± 5.9 | 17.0 ± 5.7 |
| 2         | GI <sub>50</sub> | >100             | 44.5 ± 3.4  | 58.4 ± 8.4          | >100      | 23.1 ± 14.3       | 25.5 ± 10.2 | >100       | 53.2 ± 1.2      | >100       | >100       |
|           | TGI              | >100             | 81.5 ± 2.3  | >100                | >100      | >100              | 39.0 ± 8.5  | >100       | >100            | >100       | >100       |
|           | LD <sub>50</sub> | >100             | >100        | >100                | >100      | >100              | >100        | >100       | >100            | >100       | >100       |
| 3         | GI <sub>50</sub> | 6.8 ± 1.4        | 9.3 ± 4.7   | 5.0 ± 0.2           | 4.4 ± 0.3 | 5.2 ± 0.2         | 1.8 ± 0.2   | 7.1 ± 0.5  | 6.7 ± 1.1       | 3.3 ± 0.4  | 7.0 ± 2.5  |
|           | TGI              | >100             | 30.9 ± 16.7 | 6.1 ± 0.6           | 5.0 ± 0.1 | 5.6 ± 0.8         | 3.1 ± 0.3   | 9.4 ± 0.2  | >100            | >100       | 9.0 ± 1.2  |
|           | LD <sub>50</sub> | >100             | >100        | 10.4 ± 2.4          | 5.9 ± 0.9 | >100              | 6.3 ± 0.7   | >100       | >100            | >100       | 12.3 ± 2.1 |
| 4         | GI <sub>50</sub> | 24.4 ± 2.6       | 4.3 ± 0.6   | 19.5 ± 3.5          | 4.8 ± 0.4 | 2.4 ± 0.5         | >100        | 4.8 ± 0.3  | 24.6 ± 1.8      | 8.1 ± 0.4  | 4.2 ± 0.6  |
|           | TGI              | 36.2 ± 3.0       | 6.7 ± 1.9   | 28.5 ± 2.9          | 5.5 ± 0.5 | 4.2 ± 1.7         | 9.5 ± 2.3   | 5.4 ± 0.4  | 33.6 ± 1.6      | 19.9 ± 3.4 | 4.7 ± 0.3  |
|           | LD <sub>50</sub> | 62.5 ± 14.3      | >100        | 39.6 ± 2.4          | 6.7 ± 1.2 | >100              | 27.2 ± 2.3  | >100       | 43.5 ± 1.8      | >100       | 5.4 ± 0.4  |
| 5         | GI <sub>50</sub> | 4.8 ± 1.0        | 4.6 ± 1.5   | 6.0 ± 1.3           | 4.7 ± 0.2 | 4.8 ± 1.1         | 1.8 ± 0.4   | 6.6 ± 1.5  | 8.1 ± 1.0       | 2.3 ± 0.2  | 7.8 ± 2.3  |
|           | TGI              | 7.2 ± 1.8        | 10.3 ± 3.8  | 7.3 ± 0.9           | 6.1 ± 0.5 | 7.9 ± 3.8         | 2.7 ± 0.3   | 11.1 ± 1.4 | 10.2 ± 1.0      | >100       | 9.8 ± 1.6  |
|           | LD <sub>50</sub> | >100             | >100        | 9.0 ± 0.4           | 8.9 ± 1.9 | >100              | 4.2 ± 0.3   | >100       | 16.5 ± 5.1      | >100       | 14.8 ± 4.7 |

<sup>a</sup>GI<sub>50</sub>, TGI and LD<sub>50</sub> values are presented as the mean ± SD of at least three independent experiments determined by the MTT assay.

Chemical characterization – NMR spectra

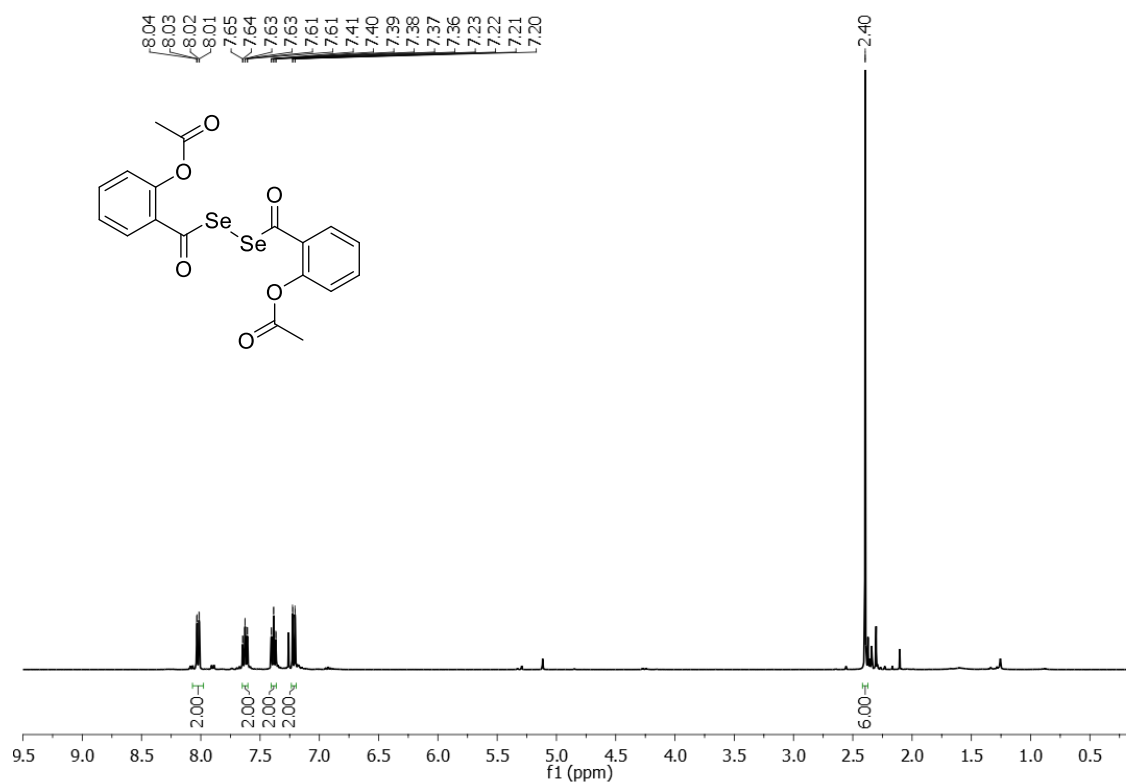

Figure S1. <sup>1</sup>H-NMR spectrum of compound 1.

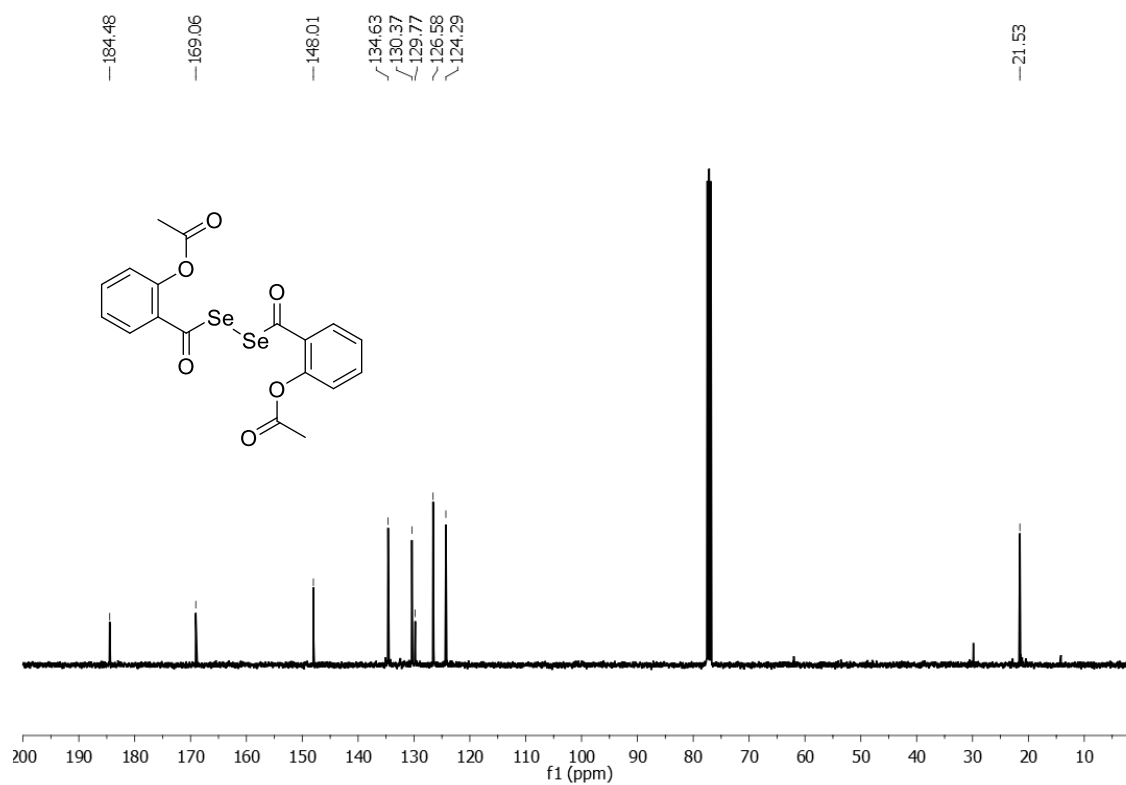

Figure S2. <sup>13</sup>C-NMR spectrum of compound 1.

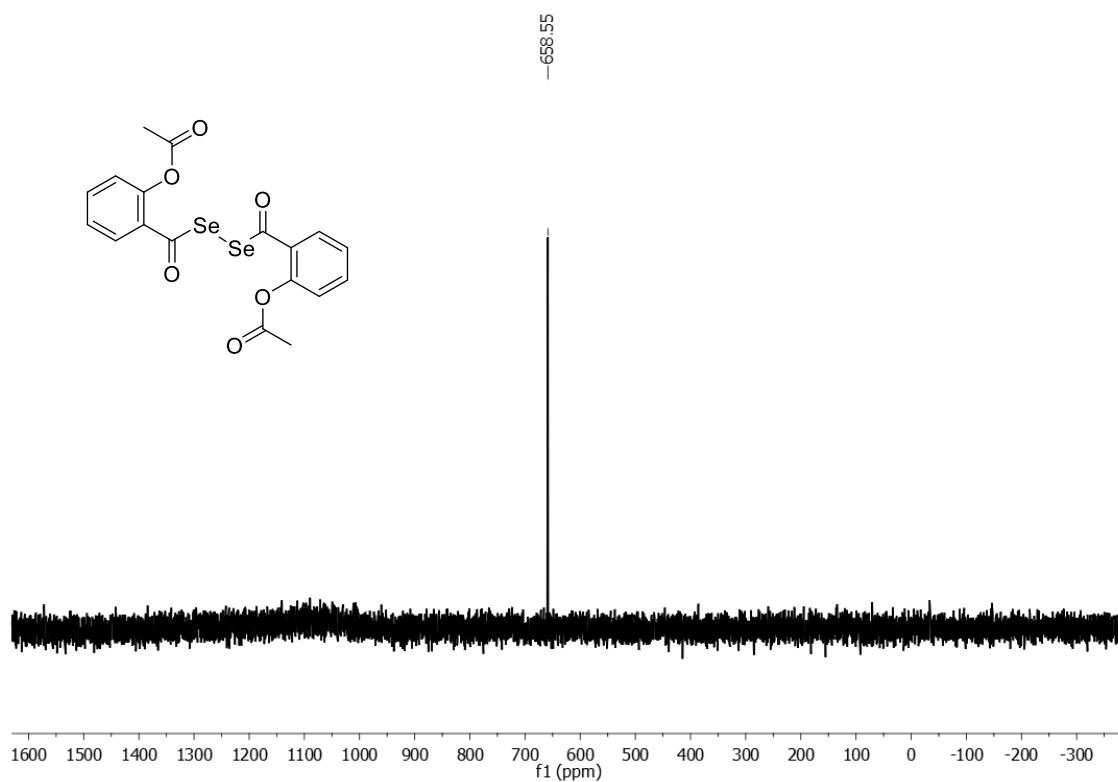

**Figure S3.** <sup>77</sup>Se-NMR spectrum of compound 1.

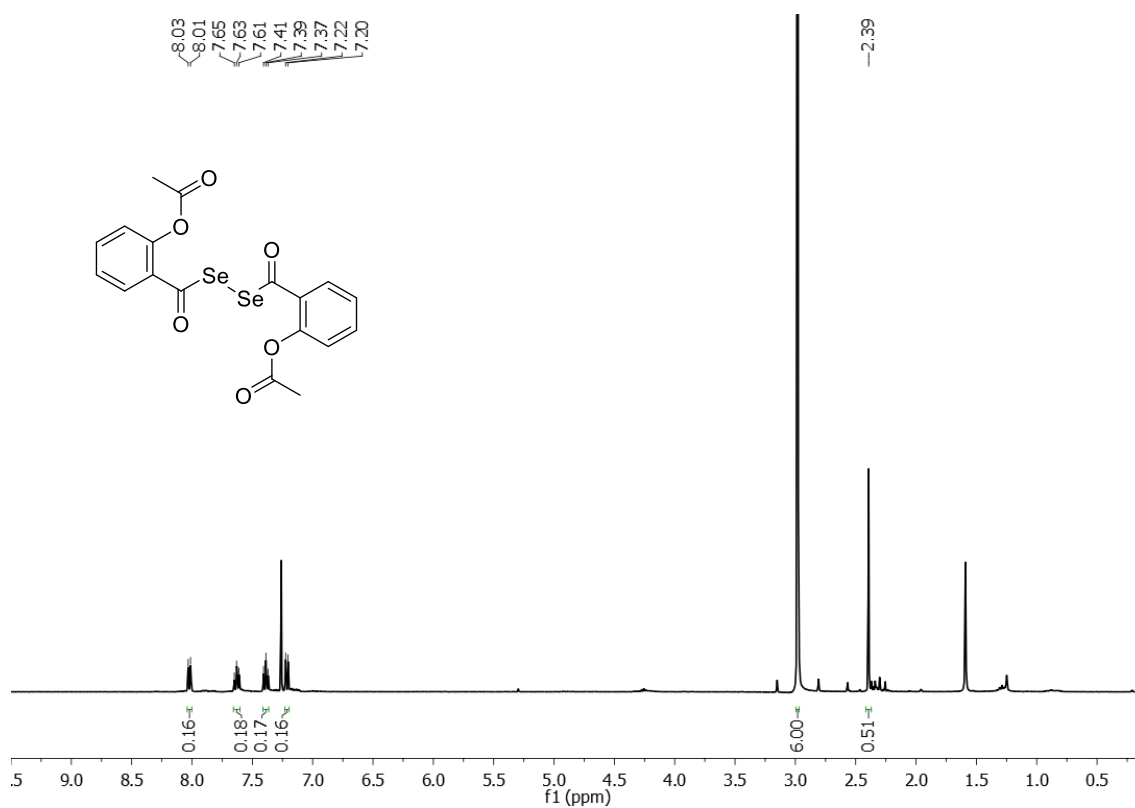

**Figure S4.** qNMR spectrum of compound 1.

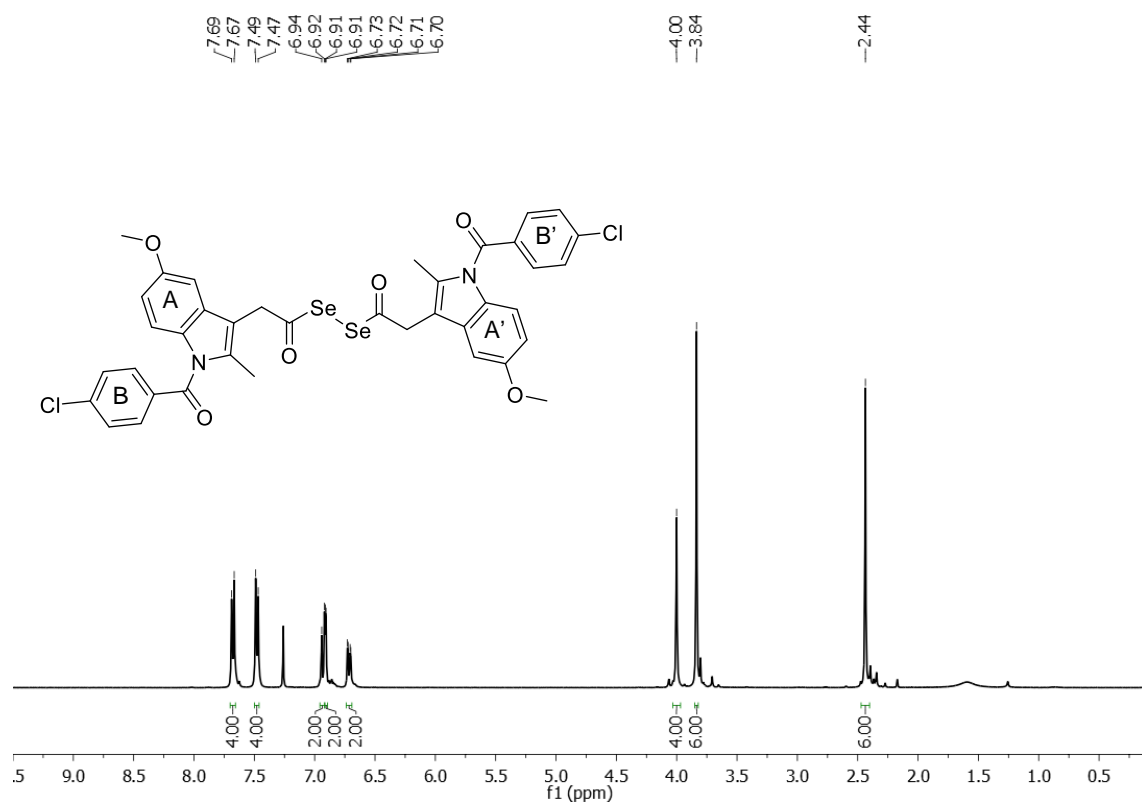

**Figure S5.** <sup>1</sup>H-NMR spectrum of compound **2**.

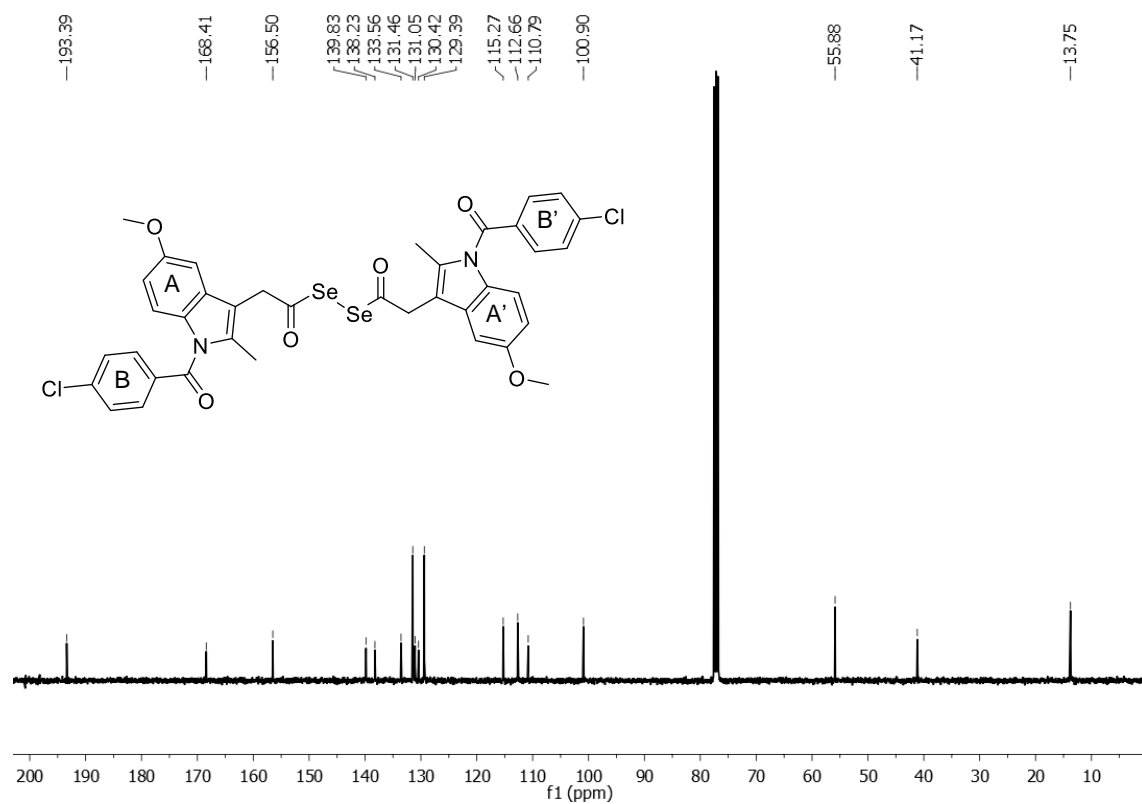

**Figure S6.** <sup>13</sup>C-NMR spectrum of compound **2**.

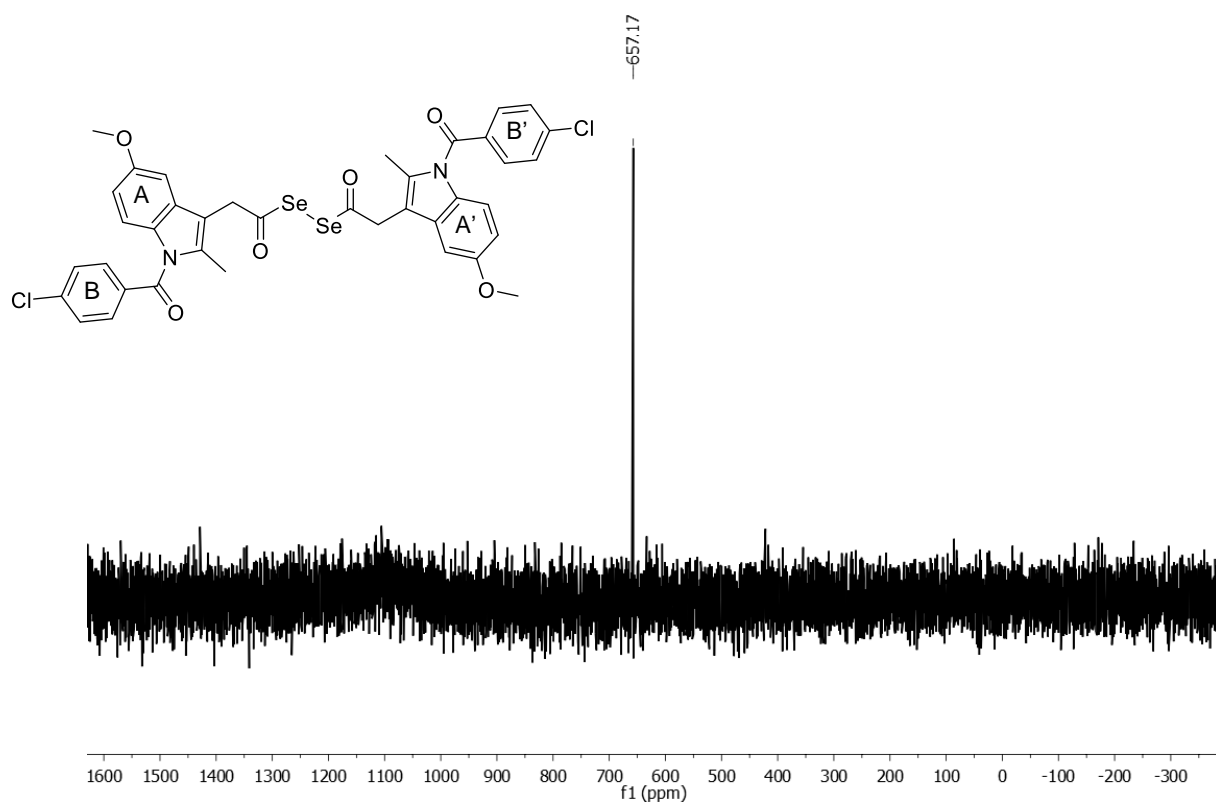

**Figure S7.**  $^{77}\text{Se}$ -NMR spectrum of compound 2.

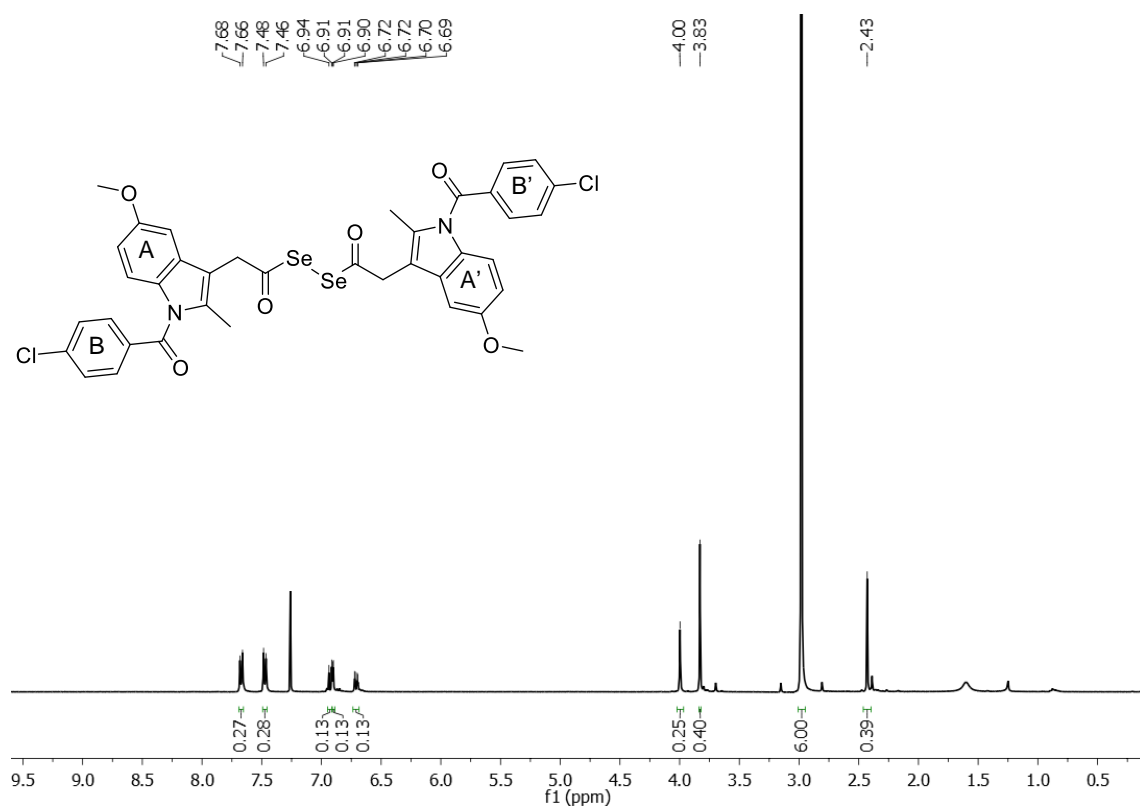

**Figure S8.** qNMR spectrum of compound 2.

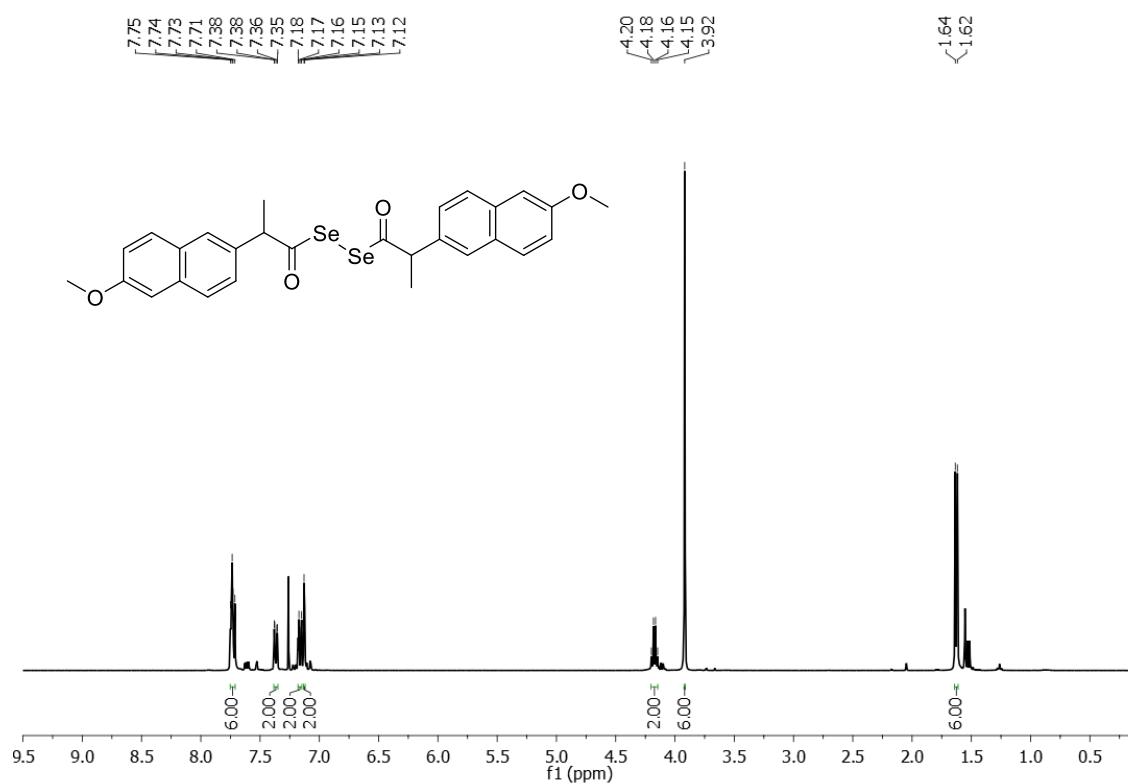

**Figure S9.** <sup>1</sup>H-NMR spectrum of compound **3**.

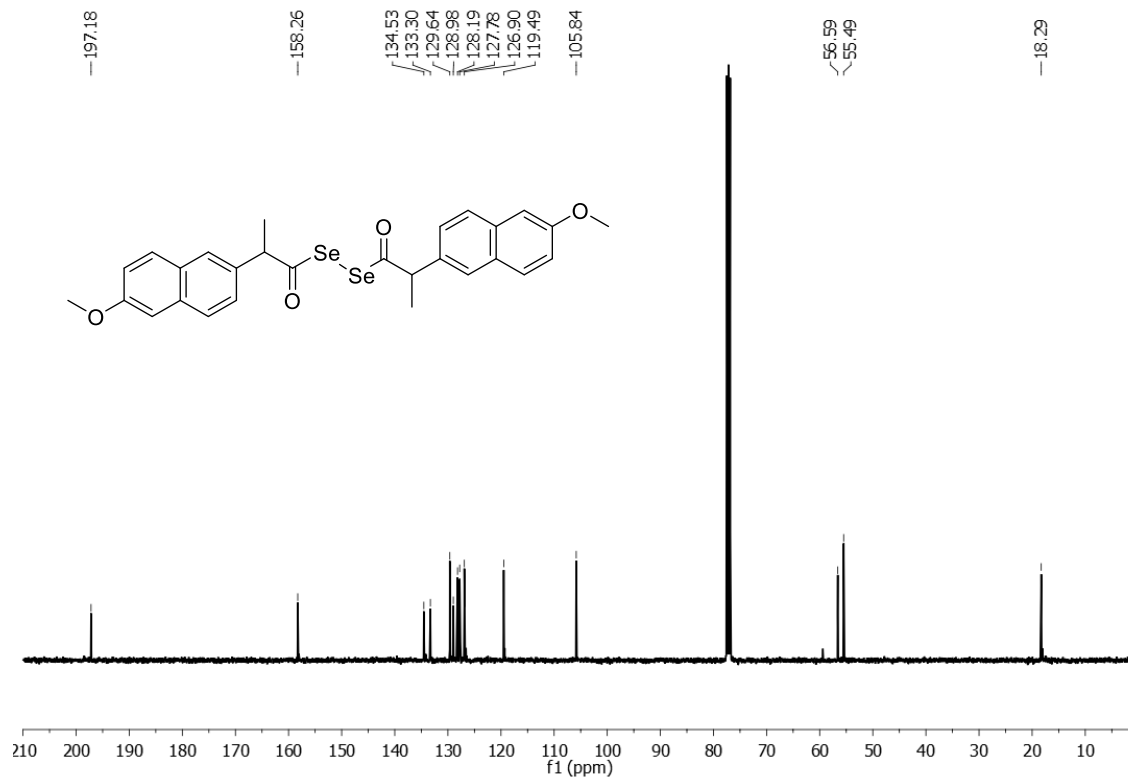

**Figure S10.** <sup>13</sup>C-NMR spectrum of compound **3**.

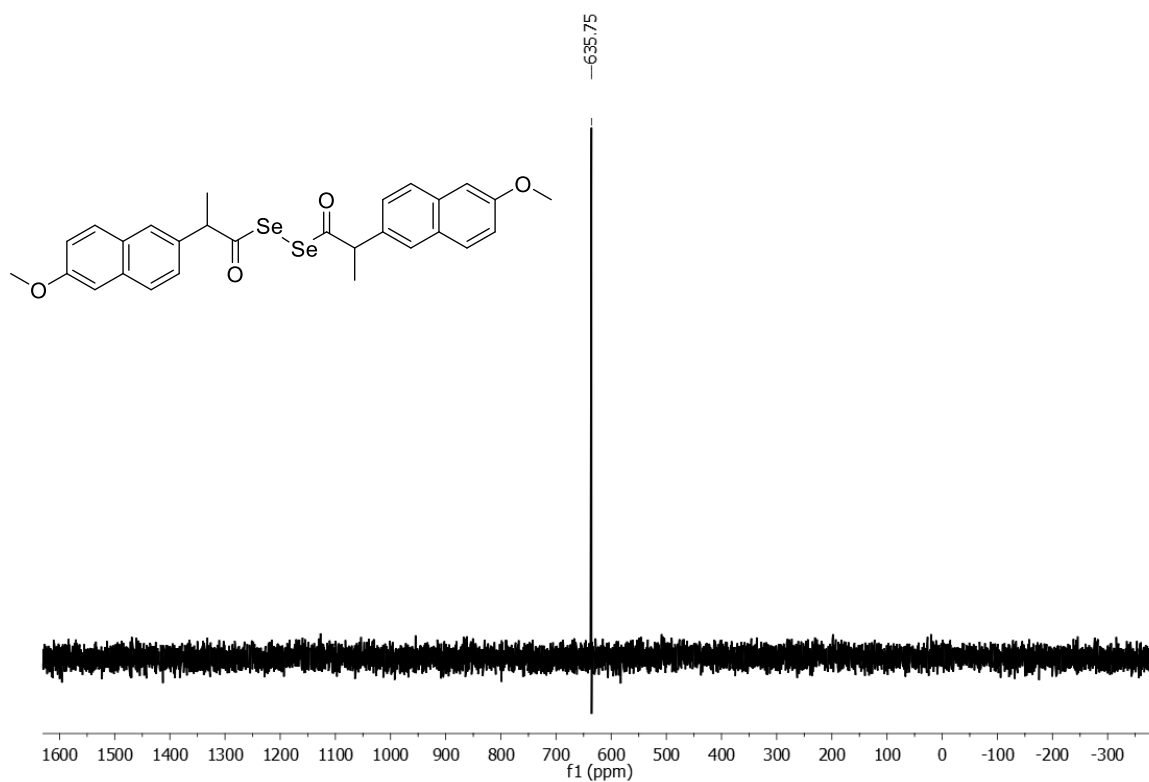

**Figure S11.**  $^{77}\text{Se}$ -NMR spectrum of compound **3**.

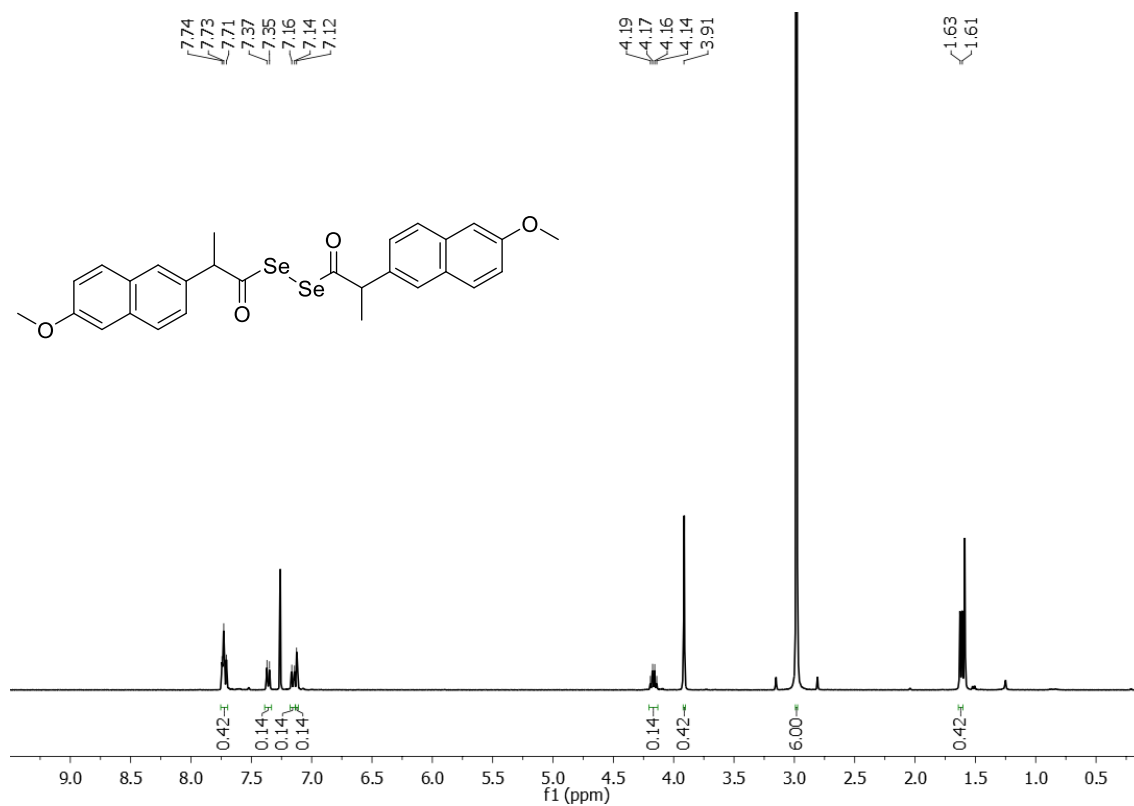

**Figure S12.** qNMR spectrum of compound **3**.



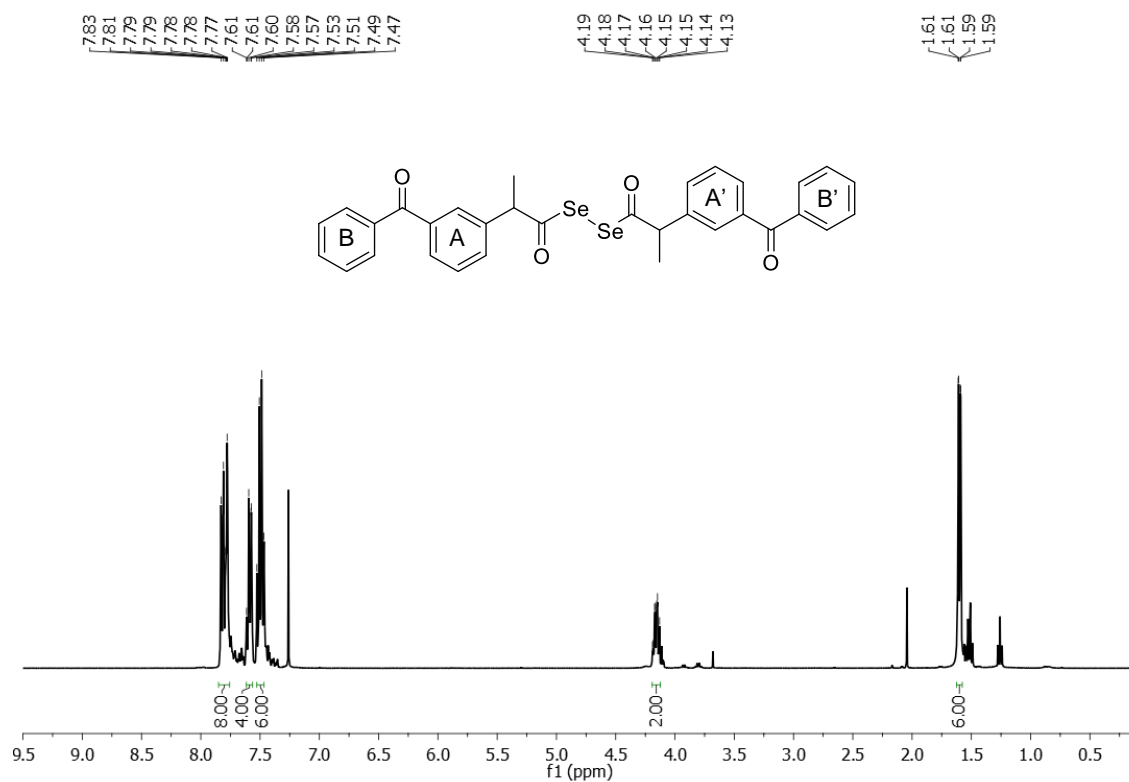

**Figure S13.** <sup>1</sup>H-NMR spectrum of compound 4.

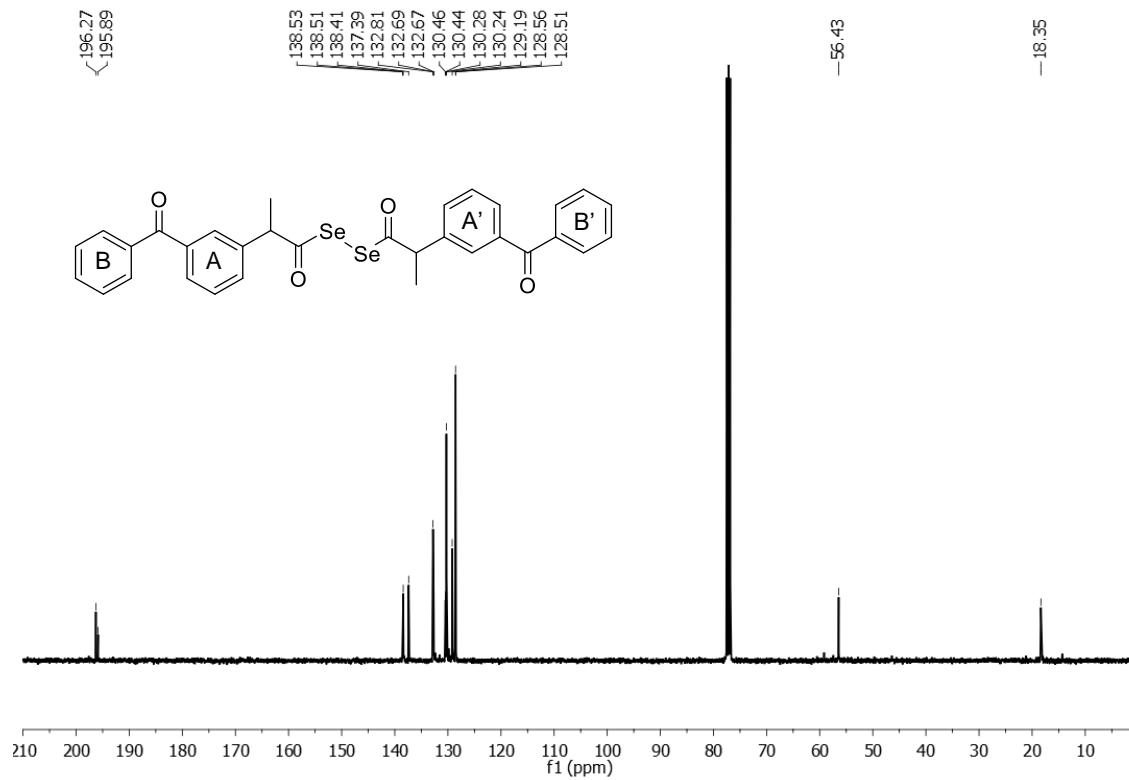

**Figure S14.** <sup>13</sup>C-NMR spectrum of compound 4.

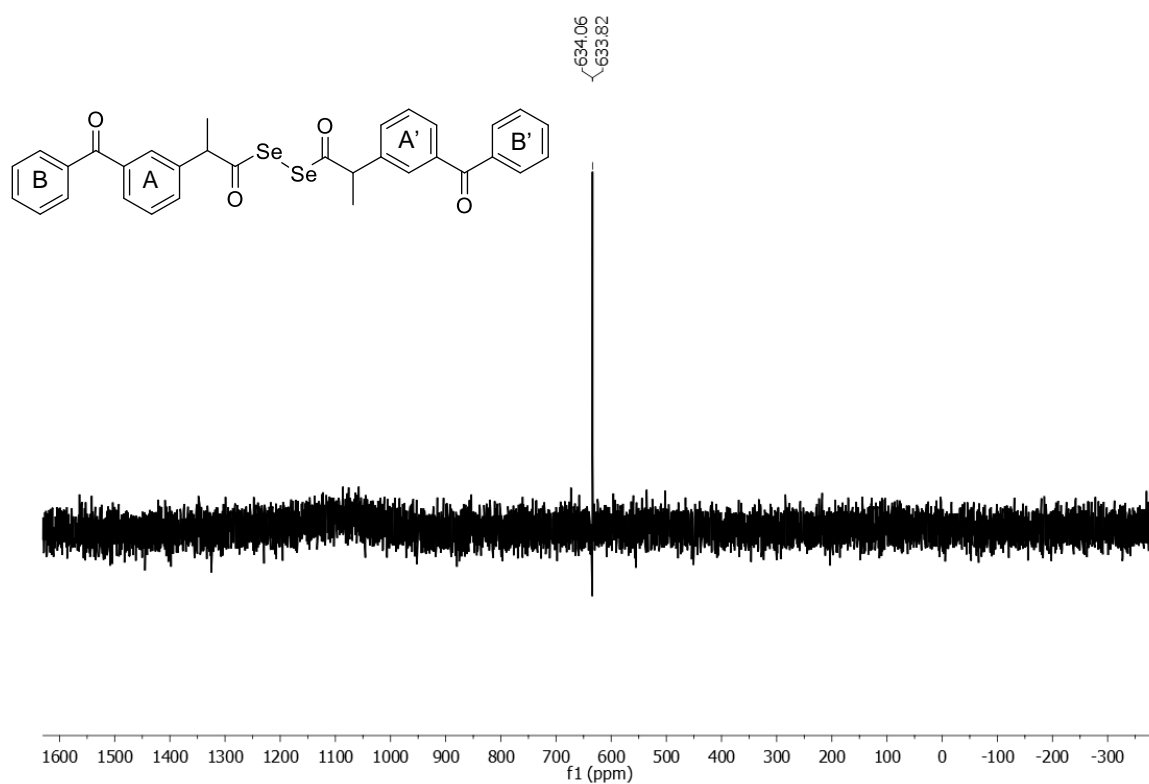

**Figure S15.** <sup>77</sup>Se-NMR spectrum of compound 4.

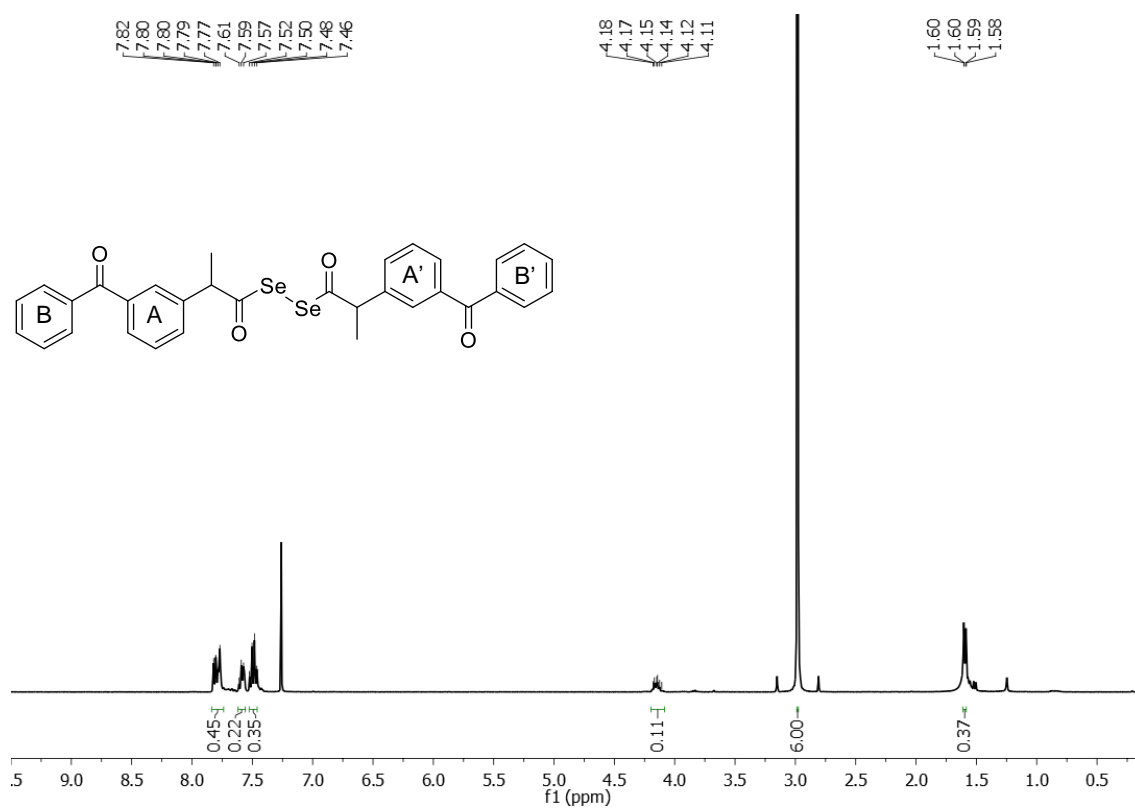

**Figure S16.** qNMR spectrum of compound 4.

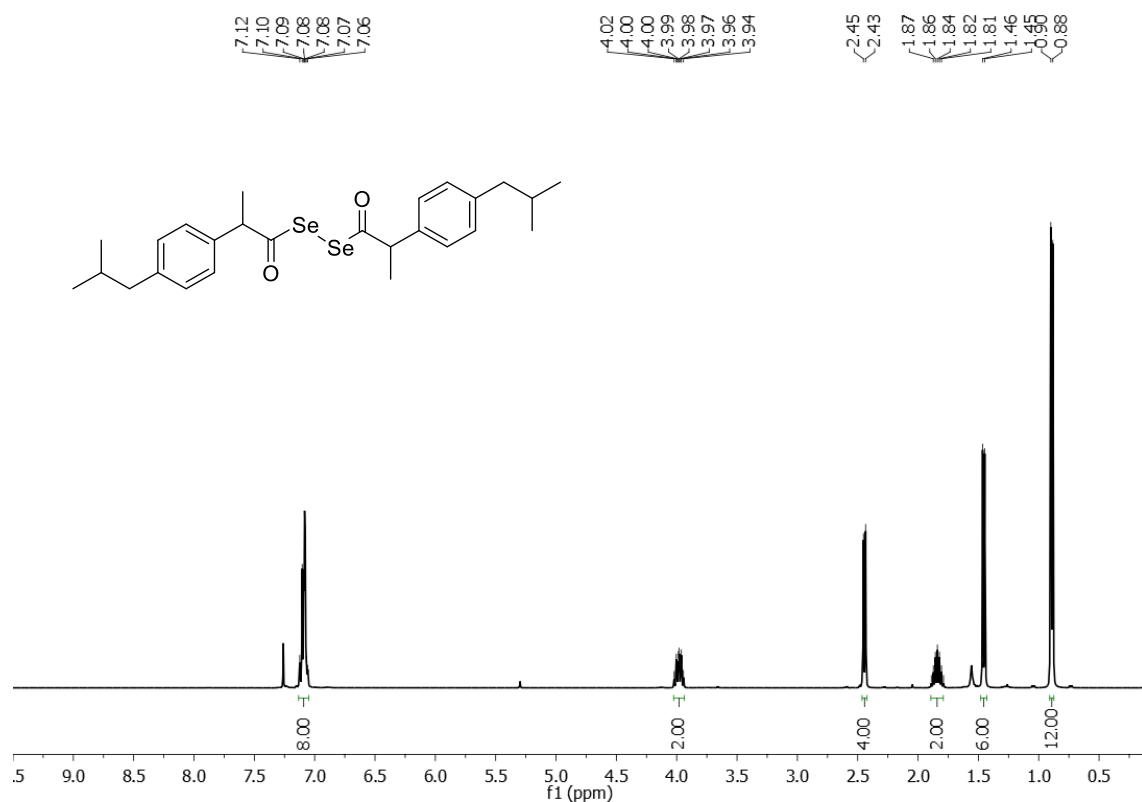

**Figure S17.** <sup>1</sup>H-NMR spectrum of compound 5.

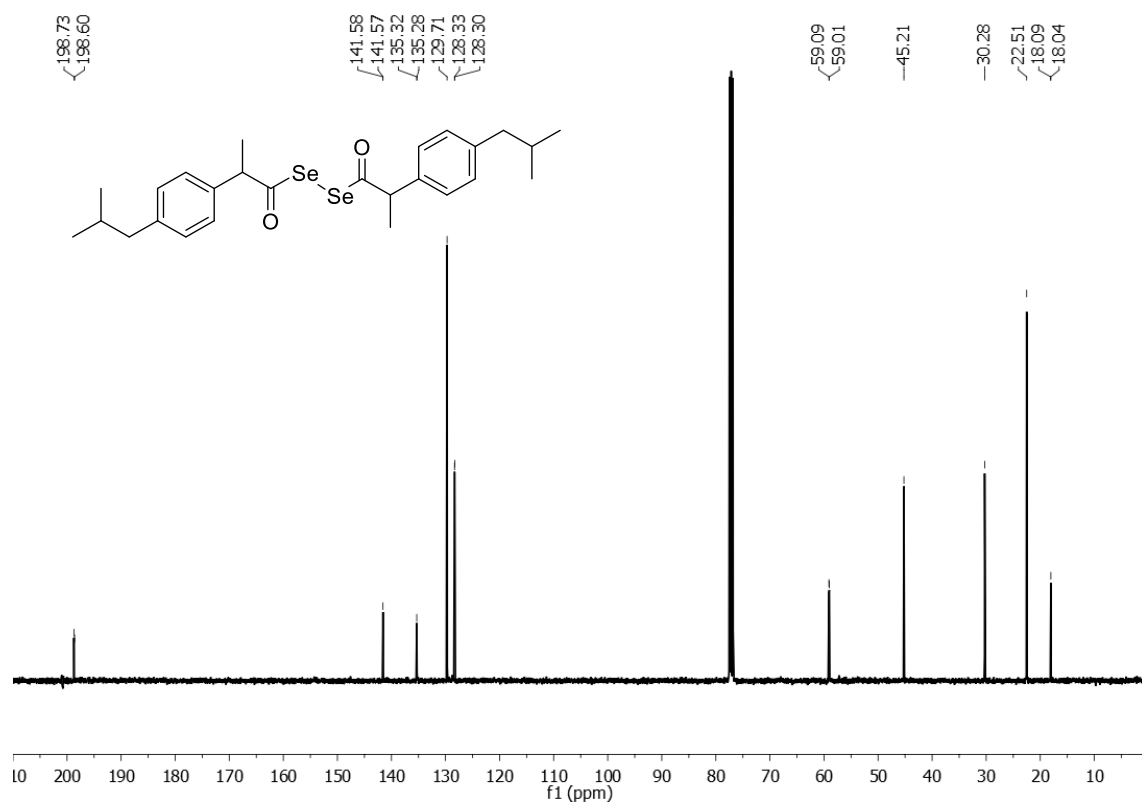

**Figure S18.** <sup>13</sup>C-NMR spectrum of compound 5.

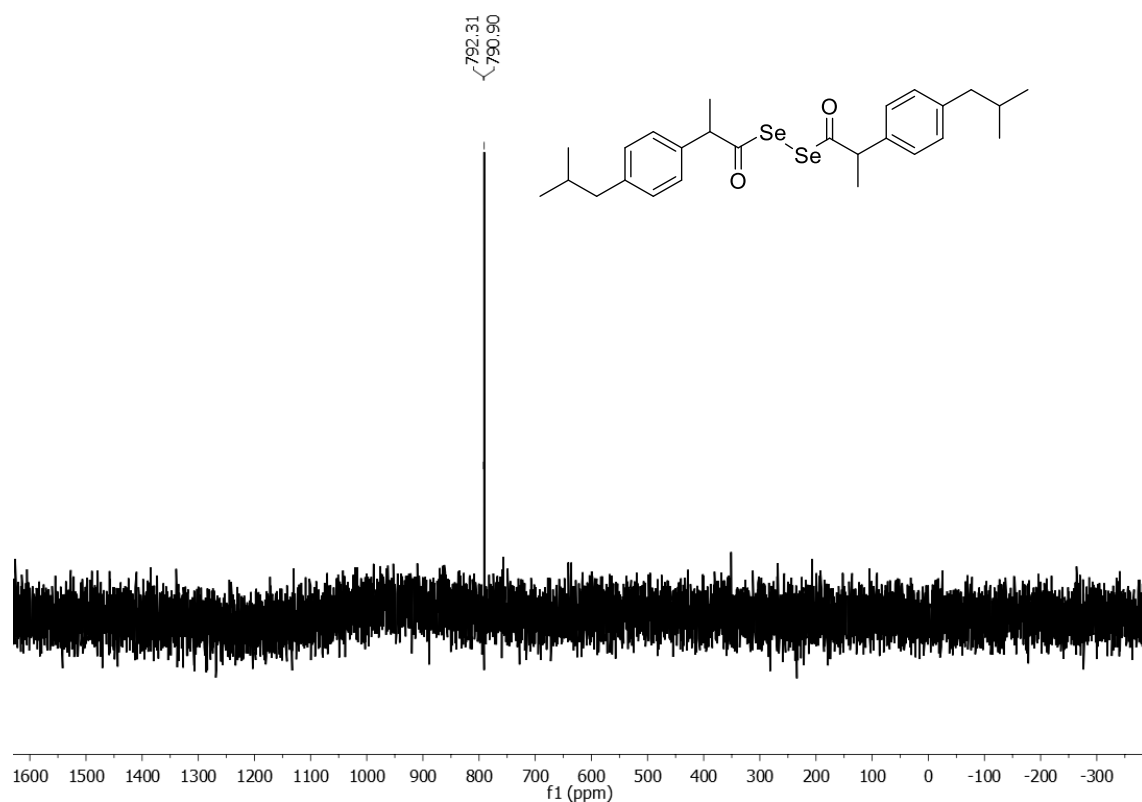

**Figure S19.** <sup>77</sup>Se-NMR spectrum of compound 5.

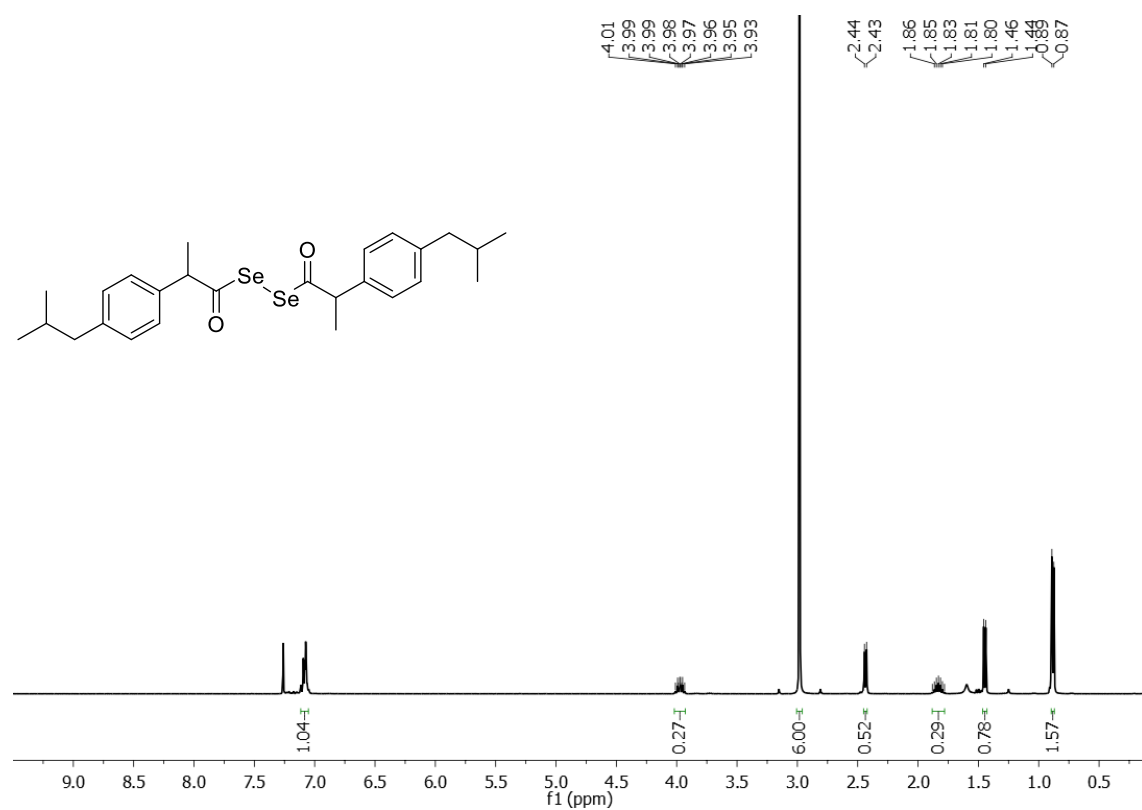

**Figure S20.** <sup>1</sup>H-NMR spectrum of compound 5.

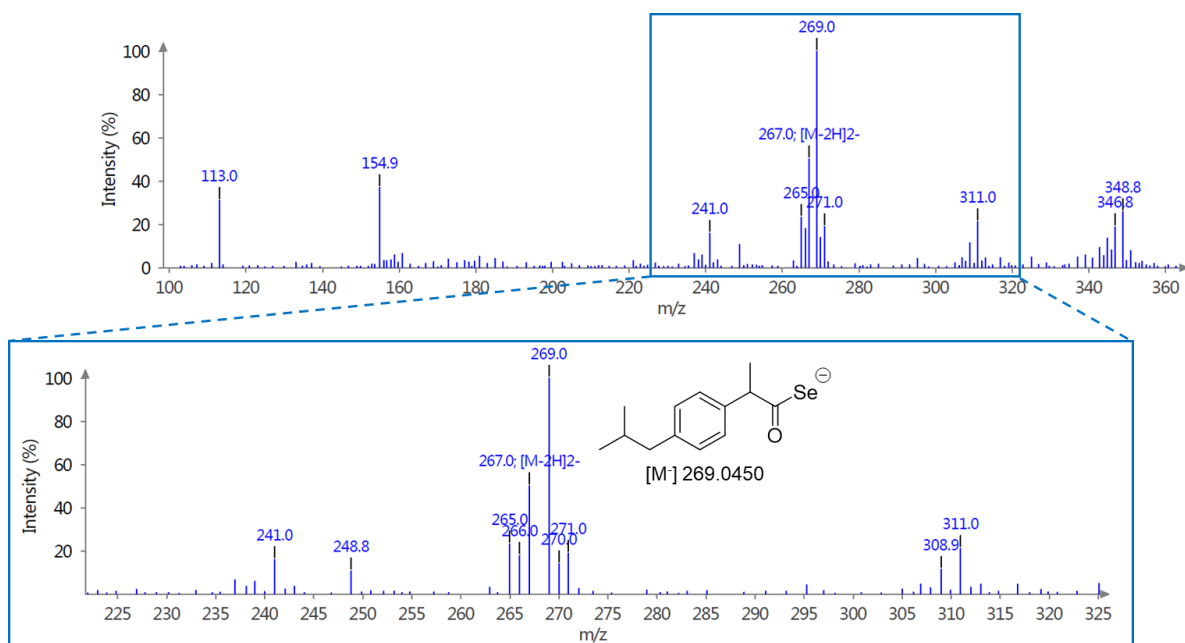

**Figure S21.** Mass spectrum of compound 5 obtained with a negative ionization mode.
